# Supplementary material for: Reliability and validity of the Patient Benefit Assessment Scale for Hospitalised Older Patients (P-BAS HOP)
Source: Research Square preprint supplement (doi:10.21203/rs.3.rs-109453/v1), 2020-11-20
Supplement: Supplementary file 1 [file 1014d6feaa2cb6758d12185e.docx]

**Additional file 3. Crosstabs of test-retest Follow-up**

Retest

| Item | Test | Not at all | Somewhat | Quite | Completely | Total | Weighted Kappa (95% CI) |
| --- | --- | --- | --- | --- | --- | --- | --- |
| Better | Not at all | **2** | 2 | 1 | 1 | 6 | 0.51 (0.20;0.81) |
| Somewhat | 1 | **4** | 8 | 1 | 14 |
| Quite | 0 | 3 | **12** | 4 | 19 |
| Completely | 0 | 1 | 3 | **8** | 12 |
| Total | 3 | 10 | 24 | 14 | **51** |
|  | | | | | | | |
| Energy | Not at all | **3** | 5 | 2 | 1 | 11 | 0.45 (0.16;0.74) |
| Somewhat | 4 | **5** | 4 | 0 | 13 |
| Quite | 1 | 1 | **6** | 2 | 10 |
| Completely | 1 | 0 | 2 | **4** | 7 |
| Total | 9 | 11 | 14 | 7 | **41** |
|  | | | | | | | |
| Pain | Not at all | **3** | 1 | 0 | 0 | 4 | 0.72 (nc) |
| Somewhat | 1 | **0** | 0 | 0 | 1 |
| Quite | 1 | 2 | **1** | 2 | 6 |
| Completely | 0 | 0 | 1 | **2** | 3 |
| Total | 5 | 3 | 2 | 4 | **14** |
|  | | | | | | | |
| Bowel movement | Not at all | **0** | 1 | 0 | 0 | 1 | 0.50 (0:1) |
| Somewhat | 0 | **0** | 0 | 1 | 1 |
| Quite | 0 | 0 | **0** | 0 | 0 |
| Completely | 0 | 0 | 1 | **2** | 3 |
| Total | 0 | 1 | 1 | 3 | **5** |
|  | | | | | | | |
| Shortness of breath | Not at all | **4** | 0 | 0 | 2 | 6 | 0.47 (0.07;0.88) |
| Somewhat | 3 | **1** | 3 | 1 | 8 |
| Quite | 0 | 2 | **6** | 0 | 8 |
| Completely | 0 | 0 | 0 | **3** | 3 |
| Total | 7 | 3 | 9 | 6 | **25** |
|  | | | | | | | |
| Walking | Not at all | **5** | 0 | 0 | 3 | 8 | 0.24 (0;0.50) |
| Somewhat | 2 | **1** | 3 | 1 | 7 |
| Quite | 0 | 2 | **1** | 2 | 5 |
| Completely | 1 | 1 | 1 | **2** | 5 |
| Total | 8 | 4 | 5 | 8 | **25** |
|  | | | | | | | |
| Appetite | Not at all | **2** | 1 | 0 | 1 | 4 | 0.63 (0,02;1) |
| Somewhat | 0 | **2** | 0 | 0 | 2 |
| Quite | 0 | 0 | **1** | 0 | 1 |
| Completely | 0 | 0 | 0 | **2** | 2 |
| Total | 2 | 3 | 1 | 3 | **9** |
|  | | | | | | | |
| Knowing what is wrong | Not at all | **0** | 0 | 1 | 0 | 1 | 0.17 (nc) |
| Somewhat | 0 | **0** | 0 | 0 | 0 |
| Quite | 0 | 0 | **0** | 1 | 1 |
| Completely | 1 | 0 | 0 | **7** | 8 |
| Total | 1 | 0 | 1 | 8 | **10** |

| Item | Test  Retest | Not at all | Somewhat | Quite | Completely | Total | Weighted Kappa (95% CI) |
| --- | --- | --- | --- | --- | --- | --- | --- |
| Controlling disease | Not at all | **4** | 0 | 1 | 1 | 6 | 0.59 (0.28;0.90) |
| Somewhat | 0 | **2** | 1 | 0 | 3 |
| Quite | 0 | 4 | **1** | 1 | 6 |
| Completely | 1 | 0 | 4 | **9** | 14 |
| Total | 5 | 6 | 7 | 11 | **29** |
|  | | | | | | | |
| Alive | Not at all | **1** | 1 | 1 | 1 | 4 | 0.50 (0.18;0.82) |
| Somewhat | 0 | **0** | 2 | 2 | 4 |
| Quite | 0 | 0 | **1** | 2 | 3 |
| Completely | 0 | 0 | 2 | **15** | 17 |
| Total | 1 | 1 | 6 | 20 | **28** |
|  | | | | | | | |
| Enjoying life | Not at all | **3** | 0 | 0 | 0 | 3 | 0.88 (0.65;1) |
| Somewhat | 0 | **2** | 1 | 0 | 3 |
| Quite | 0 | 0 | **3** | 0 | 3 |
| Completely | 0 | 1 | 0 | **7** | 8 |
| Total | 3 | 3 | 4 | 7 | **17** |
|  | | | | | | | |
| Groceries | Not at all | **0** | 1 | 0 | 1 | 2 | nc |
| Somewhat | 0 | **0** | 1 | 0 | 1 |
| Quite | 1 | 0 | **0** | 0 | 1 |
| Completely | 0 | 1 | 0 | **0** | 1 |
| Total | 1 | 2 | 1 | 1 | **5** |
|  | | | | | | | |
| Washing and dressing | Not at all | **0** | 0 | 0 | 0 | 0 | 0.58 (0;1) |
| Somewhat | 0 | **0** | 0 | 0 | 0 |
| Quite | 0 | 1 | **0** | 0 | 1 |
| Completely | 0 | 0 | 1 | **3** | 4 |
| Total | 0 | 1 | 1 | 3 | **5** |
|  | | | | | | | |
| Gardening | Not at all | **2** | 0 | 0 | 1 | 3 | 0.40 (0;87) |
| Somewhat | 0 | **1** | 2 | 1 | 4 |
| Quite | 1 | 0 | **1** | 1 | 3 |
| Completely | 0 | 0 | 1 | **2** | 3 |
| Total | 3 | 1 | 4 | 5 | **13** |
|  | | | | | | | |
| Sports | Not at all | **4** | 1 | 1 | 0 | 6 | 0.61 (0.39;0.83) |
| Somewhat | 0 | **0** | 0 | 2 | 2 |
| Quite | 0 | 0 | **0** | 1 | 1 |
| Completely | 0 | 0 | 2 | **1** | 3 |
| Total | 4 | 1 | 3 | 4 | **12** |
|  | | | | | | | |
| Hobbies | Not at all | **2** | 1 | 0 | 0 | 3 | 0.33 (0;0.69) |
| Somewhat | 1 | **1** | 0 | 0 | 2 |
| Quite | 0 | 0 | **0** | 0 | 0 |
| Completely | 0 | 1 | 0 | **0** | 1 |
| Total | 3 | 3 | 0 | 0 | **6** |

| Item | Test  Retest | Not at all | Somewhat | Quite | Completely | Total | Weighted Kappa (95% CI) |
| --- | --- | --- | --- | --- | --- | --- | --- |
| Driving | Not at all | **4** | 1 | 0 | 1 | 6 | 0.55 (0.07;1) |
| Somewhat | 1 | **0** | 0 | 0 | 1 |
| Quite | 1 | 0 | **0** | 0 | 1 |
| Completely | 0 | 0 | 0 | **2** | 2 |
| Total | 6 | 1 | 0 | 3 | **10** |
|  | | | | | | | |
| Outings | Not at all | **4** | 1 | 0 | 0 | 5 | 0.43 (0;1) |
| Somewhat | 1 | **0** | 1 | 0 | 2 |
| Quite | 0 | 0 | **0** | 0 | 0 |
| Completely | 0 | 0 | 0 | **0** | 0 |
| Total | 5 | 1 | 1 | 0 | **7** |
|  | | | | | | | |
| Visiting | Not at all | **1** | 0 | 0 | 0 | 1 | 0.25 (nc) |
| Somewhat | 2 | **0** | 1 | 0 | 3 |
| Quite | 0 | 0 | **0** | 0 | 0 |
| Completely | 0 | 0 | 0 | **0** | 0 |
| Total | 3 | 0 | 1 | 0 | **4** |
|  | | | | | | | |
| Home | Not at all | **1** | 0 | 0 | 0 | 1 | n.a. |
| Somewhat | 0 | **0** | 0 | 0 | 0 |
| Quite | 0 | 0 | **0** | 0 | 0 |
| Completely | 0 | 0 | 0 | **0** | 0 |
| Total | 1 | 0 | 0 | 0 | **1** |
|  | | | | | | | |
| Independence | Not at all | **1** | 0 | 0 | 0 | 1 | nc |
| Somewhat | 1 | **0** | 0 | 1 | 2 |
| Quite | 2 | 0 | **0** | 1 | 3 |
| Completely | 0 | 0 | 1 | **0** | 1 |
| Total | 4 | 0 | 1 | 2 | **7** |
|  | | | | | | | |
| Extra | Not at all | **0** | 0 | 0 | 0 | 0 | 1 (1;1) |
| Somewhat | 0 | **1** | 0 | 0 | 1 |
| Quite | 0 | 0 | **0** | 0 | 0 |
| Completely | 0 | 0 | 0 | **1** | 1 |
| Total | 0 | 1 | 0 | 1 | **2** |
