# Supplementary material for: Reliability and validity of the Patient Benefit Assessment Scale for Hospitalised Older Patients (P-BAS HOP)
Source: Research Square preprint supplement (doi:10.21203/rs.3.rs-109453/v1), 2020-11-20
Supplement: Supplementary file 2 [file 122929b0e461209244078115.docx]

**Additional file 2. Crosstabs of test-retest Baseline**

| Item | Test  Retest | Doesn’t apply/ not at all important | Somewhat important | Quite important | Very important | Total | Weighted Kappa (95% CI) |
| --- | --- | --- | --- | --- | --- | --- | --- |
| Better | Doesn’t apply/ not at all important | **3** | 0 | 0 | 10 | 13 | 0.14 (0.01;0.27) |
| Somewhat important | 0 | **0** | 0 | 0 | 0 |
| Quite important | 1 | 1 | **6** | 3 | 11 |
| Very important | 2 | 0 | 4 | **23** | 29 |
| Total | 6 | 1 | 10 | 36 | **53** |
|  | | | | | | | |
| Energy | Doesn’t apply/ not at all important | **15** | 2 | 4 | 4 | 25 | 0.43 (0.21;0.66) |
| Somewhat important | 1 | **0** | 0 | 0 | 1 |
| Quite important | 2 | 1 | **7** | 3 | 13 |
| Very important | 3 | 0 | 4 | **7** | 14 |
| Total | 21 | 3 | 15 | 14 | **53** |
|  | | | | | | | |
| Pain | Doesn’t apply/ not at all important | **26** | 0 | 4 | 4 | 34 | 0.52 (0.32;0.72) |
| Somewhat important | 0 | **1** | 0 | 0 | 1 |
| Quite important | 2 | 0 | **0** | 2 | 4 |
| Very important | 2 | 2 | 2 | **8** | 14 |
| Total | 30 | 3 | 6 | 14 | **53** |
|  | | | | | | | |
| Bowel movement | Doesn’t apply/ not at all important | **41** | 1 | 2 | 1 | 45 | 0.66 (0.37;0.96) |
| Somewhat important | 0 | **0** | 0 | 0 | 0 |
| Quite important | 1 | 0 | **3** | 0 | 4 |
| Very important | 1 | 0 | 0 | **3** | 4 |
| Total | 43 | 1 | 5 | 4 | **53** |
|  | | | | | | | |
| Shortness of breath | Doesn’t apply/ not at all important | **19** | 0 | 2 | 3 | 24 | 0.54 (0.33;0.75) |
| Somewhat important | 2 | **1** | 1 | 1 | 5 |
| Quite important | 1 | 0 | **4** | 4 | 9 |
| Very important | 3 | 1 | 3 | **8** | 15 |
| Total | 25 | 2 | 10 | 16 | **53** |
| Item | Test  Retest | Doesn’t apply/ not at all important | Somewhat important | Quite important | Very important | Total | Weighted Kappa (95% CI) |
| Walking | Doesn’t apply/ not at all important | **19** | 1 | 3 | 3 | 22 | 0.63 (0.46;0.81) |
| Somewhat important | 1 | **0** | 0 | 0 | 1 |
| Quite important | 1 | 1 | **1** | 2 | 5 |
| Very important | 2 | 0 | 4 | **12** | 18 |
| Total | 23 | 2 | 8 | 17 | **50** |
|  | | | | | | | |
| Appetite | Doesn’t apply/ not at all important | **38** | 2 | 6 | 0 | 46 | 0.25 (0.07;0.43) |
| Somewhat important | 2 | **0** | 0 | 0 | 2 |
| Quite important | 2 | 0 | **1** | 0 | 3 |
| Very important | 0 | 0 | 1 | **0** | 1 |
| Total | 42 | 2 | 8 | 0 | **52** |
|  | | | | | | | |
| Knowing what is wrong | Doesn’t apply/ not at all important | **28** | 2 | 2 | 3 | 35 | 0.48 (0.26;0.70) |
| Somewhat important | 0 | **0** | 0 | 0 | 0 |
| Quite important | 2 | 0 | **1** | 1 | 4 |
| Very important | 5 | 0 | 2 | **7** | 14 |
| Total | 35 | 2 | 5 | 11 | **53** |
|  | | | | | | | |
| Controlling disease | Doesn’t apply/ not at all important | **15** | 0 | 2 | 8 | 25 | 0.42 (0.21;0.63) |
| Somewhat important | 1 | **0** | 1 | 0 | 2 |
| Quite important | 1 | 1 | **2** | 2 | 6 |
| Very important | 3 | 0 | 2 | **14** | 19 |
| Total | 20 | 1 | 7 | 24 | **52** |
|  | | | | | | | |
| Alive | Doesn’t apply/ not at all important | **22** | 0 | 1 | 9 | 32 | 0.28 (0.06;0.50) |
| Somewhat important | 0 | **0** | 0 | 0 | 0 |
| Quite important | 0 | 1 | **2** | 1 | 4 |
| Very important | 7 | 0 | 1 | **9** | 17 |
| Total | 29 | 1 | 4 | 19 | **53** |

| Item | Test  Retest | Doesn’t apply/ not at all important | Somewhat important | Quite important | Very important | Total | Weighted Kappa (95% CI) |
| --- | --- | --- | --- | --- | --- | --- | --- |
| Enjoying life | Doesn’t apply/ not at all important | **31** | 0 | 2 | 8 | 41 | 0.17 (0;0.38) |
| Somewhat important | 0 | **0** | 0 | 0 | 0 |
| Quite important | 1 | 1 | **1** | 1 | 4 |
| Very important | 4 | 0 | 1 | **2** | 7 |
| Total | 36 | 1 | 4 | 11 | **52** |
|  | | | | | | | |
| Groceries | Doesn’t apply/ not at all important | **38** | 1 | 1 | 3 | 43 | 0.40 (0.14;0.66) |
| Somewhat important | 1 | **1** | 0 | 0 | 2 |
| Quite important | 0 | 0 | **1** | 1 | 2 |
| Very important | 3 | 0 | 2 | **1** | 6 |
| Total | 42 | 2 | 4 | 5 | **53** |
|  | | | | | | | |
| Washing and dressing | Doesn’t apply/ not at all important | **36** | 1 | 0 | 5 | 42 | 0.25 (0.02;0.48) |
| Somewhat important | 0 | **0** | 0 | 0 | 0 |
| Quite important | 2 | 0 | **1** | 0 | 3 |
| Very important | 3 | 1 | 2 | **1** | 7 |
| Total | 41 | 2 | 3 | 6 | **52** |
|  | | | | | | | |
| Gardening | Doesn’t apply/ not at all important | **39** | 0 | 0 | 1 | 40 | 0.55 (0.26;0.84) |
| Somewhat important | 0 | **2** | 0 | 0 | 2 |
| Quite important | 1 | 1 | **3** | 0 | 5 |
| Very important | 3 | 0 | 2 | **1** | 6 |
| Total | 43 | 3 | 5 | 2 | **53** |
|  | | | | | | | |
| Sports | Doesn’t apply/ not at all important | **35** | 2 | 0 | 1 | 38 | 0.51 (0.25;0.76) |
| Somewhat important | 1 | **0** | 0 | 0 | 1 |
| Quite important | 3 | 0 | **3** | 1 | 7 |
| Very important | 3 | 1 | 1 | **2** | 7 |
| Total | 42 | 3 | 4 | 4 | **53** |

| Item | Test  Retest | Doesn’t apply/ not at all important | Somewhat important | Quite important | Very important | Total | Weighted Kappa (95% CI) |
| --- | --- | --- | --- | --- | --- | --- | --- |
| Hobbies | Doesn’t apply/ not at all important | **37** | 1 | 1 | 3 | 42 | 0.30 (0.03;0.57) |
| Somewhat important | 0 | **0** | 0 | 0 | 0 |
| Quite important | 2 | 0 | **1** | 1 | 4 |
| Very important | 4 | 0 | 0 | **2** | 6 |
| Total | 43 | 1 | 2 | 6 | **52** |
|  | | | | | | | |
| Driving | Doesn’t apply/ not at all important | **42** | 0 | 2 | 3 | 47 | 0.05 (nc) |
| Somewhat important | 1 | **1** | 0 | 0 | 2 |
| Quite important | 1 | 0 | **1** | 0 | 2 |
| Very important | 2 | 0 | 0 | **0** | 2 |
| Total | 46 | 1 | 3 | 3 | **53** |
|  | | | | | | | |
| Outings | Doesn’t apply/ not at all important | **34** | 0 | 2 | 2 | 38 | 0.28 (0.09;0.48) |
| Somewhat important | 1 | **0** | 1 | 0 | 2 |
| Quite important | 3 | 1 | **1** | 1 | 6 |
| Very important | 3 | 1 | 2 | **0** | 6 |
| Total | 41 | 2 | 6 | 3 | **52** |
|  | | | | | | | |
| Visiting | Doesn’t apply/ not at all important | **40** | 0 | 3 | 2 | 45 | 0.29 (0.05;0.53) |
| Somewhat important | 2 | **0** | 0 | 0 | 2 |
| Quite important | 1 | 0 | **0** | 1 | 2 |
| Very important | 2 | 0 | 2 | **0** | 4 |
| Total | 45 | 0 | 5 | 3 | **53** |
|  | | | | | | | |
| Home | Doesn’t apply/ not at all important | **49** | 0 | 0 | 2 | 51 | nc |
| Somewhat important | 0 | **0** | 0 | 0 | 0 |
| Quite important | 0 | 0 | **0** | 0 | 0 |
| Very important | 1 | 0 | 0 | **0** | 1 |
| Total | 50 | 0 | 0 | 2 | **52** |

| Item | Test  Retest | Doesn’t apply/ not at all important | Somewhat important | Quite important | Very important | Total | Weighted Kappa (95% CI) |
| --- | --- | --- | --- | --- | --- | --- | --- |
| Independence | Doesn’t apply/ not at all important | **40** | 0 | 1 | 2 | 43 | 0.54 (0.28;0.79) |
| Somewhat important | 0 | **0** | 0 | 0 | 0 |
| Quite important | 3 | 0 | **0** | 1 | 4 |
| Very important | 1 | 0 | 2 | **2** | 5 |
| Total | 44 | 0 | 3 | 5 | **52** |
