# Supplementary material for: Reliability and validity of the Patient Benefit Assessment Scale for Hospitalised Older Patients (P-BAS HOP)
Source: Research Square preprint supplement (doi:10.21203/rs.3.rs-109453/v1), 2020-11-20
Supplement: Supplementary file 4 [file 757f32082d745ac1d000d758.docx]

**Additional file 5. Crosstabs hypotheses follow-up validity**

| Hypothesis | Answer P-BAS HOP | Change on Katz-15 and/or EQ-5D | | Total | Cramér’s V |
| --- | --- | --- | --- | --- | --- |
| n (% within Katz-15 and/or EQ-5D) | | |
| Deteriorated | Equal/ improved |  |
| Participants who indicated a deterioration on the Katz-15 items bathing and/ or getting dressed and/ or the EQ-5D item self-care, are expected to have a lower score on the item wash and dress yourself. | Not at all | 3 (75) | 7 (24) | 10 (30) | n.c. |
| Somewhat | 0 (0) | 4 (14) | 4 (12) |
| Quite | 1 (25) | 2 (7) | 3 (9) |
| Completely | 0 (0) | 16 (55) | 16 (49) |
| Total | 4 | 29 | 33 |
|  | | | | | |
|  | Answer P-BAS HOP | Change on Katz-15 and/or EQ-5D | | Total | Cramér’s V |
| n (% within Katz-15 and/or EQ-5D) | | |
| Deteriorated | Equal/ improved |  |
| Participants who indicated a deterioration on the Katz-15 item walking and/ or the EQ-5D item walking, are expected to have a lower score on the item walking.* | Not at all | 5 (31) | 43 (43) | 48 (41) | .23$ |
| Somewhat | 1 (6) | 21 (21) | 22 (19) |
| Quite | 3 (19) | 19 (19) | 22 (19) |
| Completely | 7 (44) | 17 (17) | 24 (21) |
| Total | 17 | 100 | 116 |
|  | | | | | |
|  | Answer P-BAS HOP | Change on Katz-15 | | Total | Cramér’s V |
| n (%within Katz-15) | | |
| Deteriorated | Equal/ improved |  |
| Participants who indicated a deterioration on the Katz-15 item travelling, are expected to have a lower score on the item driving. | Not at all | 3 (100) | 12 (35) | 15 (41) | n.c. |
| Somewhat | 0 (0) | 2 (6) | 2 (5) |
| Quite | 0 (0) | 2 (6) | 2 (5) |
| Completely | 0 (0) | 18 (53) | 18 (49) |
| Total | 3 | 34 | 37 |
|  | | | | | |
|  | Answer P-BAS HOP | Change on Katz-15 | | Total | Cramér’s V |
| n (%within Katz-15) | | |
| Deteriorated | Equal/ improved |  |
| Participants who indicated a deterioration on the Katz-15 item shopping, are expected to have a lower score on the item groceries. | Not at all | 3 (75) | 10 (30) | 13 (35) | n.c. |
| Somewhat | 0 (0) | 4 (12) | 4 (11) |
| Quite | 0 (0) | 6 (18) | 6 (16) |
| Completely | 1 (25) | 13 (39) | 14 (38) |
| Total | 4 | 33 | 37 |
|  | | | | | |
|  | Answer P-BAS HOP | Change on EQ-5D | | Total | Cramér’s V |
| n (% within EQ-5D) | | |
| Deteriorated | Equal/ improved |  |
| Participants who indicated a deterioration on the EQ-5D item pain/ discomfort, are expected to have a lower score on the item pain.* | Not at all | 3 (16) | 25 (30) | 28 (28) | .14$ |
| Somewhat | 5 (26) | 13 (16) | 18 (18) |
| Quite | 2 (11) | 17 (21) | 19 (19) |
| Completely | 9 (47) | 28 (34) | 37 (36) |
| Total | 19 | 83 | 102 |
|  | | | | | |
| Hypothesis | Answer P-BAS HOP |  | | Total | Cramér’s V |
| n (% within VMS) | | |
| yes | no |  |
| Participants who indicated a lack of appetite on the VMS, are expected to have a lower score on the item appetite.* | Not at all | 8 (42) | 7 (27) | 15 (33) | .46 |
| Somewhat | 5 (26) | 2 (8) | 7 (16) |  |
| Quite | 4 (21) | 3 (12) | 7 (16) |  |
| Completely | 2 (11) | 14 (54) | 16 (36) |  |
| Total | 19 | 26 | 45 |  |
|  | | | | | |
|  | Answer P-BAS HOP | Change on MSPP | | Total | Cramér’s V |
| n (% within MSPP) | | |
| Deteriorated | Equal/ improved |  |
| Participants who indicated a deterioration on the MSPP item organised sports and/ or the MSPP item done something with others that required considerable physical effort, are expected to have a lower score on the item sports. | Not at all | 3 (50) | 6 (40) | 9 (43) | n.c. |
| Somewhat | 1 (17) | 2 (13) | 3 (14) |  |
| Quite | 0 (0) | 6 (40) | 6 (29) |  |
| Completely | 2 (33) | 1 (7) | 3 (14) |  |
| Total | 6 | 15 | 21 |  |
|  | Answer P-BAS HOP | Change of MSPP or SF-36 social functioning | | Total | Cramér’s V |
| n (% within MSPP or SF-36) | | |
| Deteriorated | Equal/ improved |  |
| Participants who indicated a deterioration on the MSPP item seeing family/ acquaintances or the question ‘During the past 4 weeks, how much of the time has your physical health or emotional problems interfered with your social activities?’, are expected to have a lower score on the item visiting family or friends. | Not at all | 3 (50) | 13 (54) | 16 (53) | n.c. |
| Somewhat | 1 (17) | 3 (13) | 4 (13) |  |
| Quite | 0 (0) | 2 (8) | 2 (7) |  |
| Completely | 2 (33) | 6 (25) | 8 (27) |  |
| Total | 6 | 24 | 30 |  |
|  | | | | | |
|  | Answer P-BAS HOP | Change in living situation | | Total | Cramér’s V |
| n (% within living situation) | | |
| To sheltered/ nursing home | Equal/ improved |  |
| Participants who moved from independent living to sheltered living or a nursing home, are expected to score lower on the item back to own home. | Not at all | 1 (50) | 0 (0) | 1 (9) | n.c. |
| Somewhat | 0 (0) | 1 (11) | 1 (9) |  |
| Quite | 0 (0) | 0 (0) | 0 (0) |  |
| Completely | 1 (50) | 8 (89) | 9 (82) |  |
| Total | 2 | 9 | 11 |  |

$ Association is reversed to hypothesis

* To fit the assumptions of the Cramér’s V statistic, the categories somewhat and quite were combined.
